# Supplementary material for: Synthesis of polystyrene-based Y-shaped asymmetric star by the combination of ATRP/RAFT and its thermal and rheological properties
Source: Royal Society of Chemistry journal article supplement (doi:10.1039/c6ra20541k), 2016-01-01
Supplement: c6ra20541k1.pdf [file c6ra20541k1.pdf]

## Synthesis of Polystyrene-based Y-Shaped Asymmetric Star by the Combination of ATRP/RAFT and Its Thermal and Rheological Properties

Haiying Tan<sup>a,b</sup>, Guangchun Zhang<sup>a,b</sup>, Yichao Lin<sup>a,b</sup>, Li Ma<sup>a\*</sup>, Tao Tang<sup>a\*</sup>

*a. State Key Laboratory of Polymer Physics and Chemistry, Changchun Institute of Applied Chemistry, Chinese Academy of Sciences, Changchun 130022, China*

*b. Graduate School of the Chinese Academy of Sciences, Beijing 100039, China*

*Correspondence to: Tao Tang (E-mail: ttang@ciac.ac.cn) and Li Ma (E-mail: mali@ciac.ac.cn)*

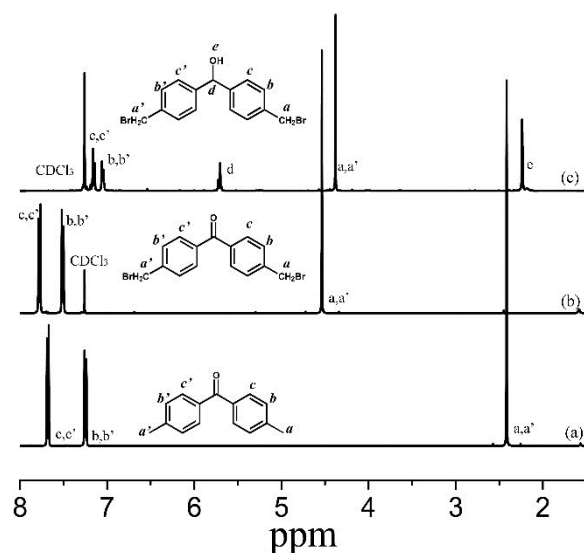

**FIGURE S1.** <sup>1</sup>H NMR spectra of precursors: (a) 4,4'-dimethylbenzophenone, (b) 4,4'-di(bromomethyl)benzophenone and (c) 4,4'-di(bromomethyl)benzhydrol.

**Table S1.** Aymmetric Polystyrene Stars (PS<sub>x</sub>)<sub>2</sub>-*p*-(PS<sub>y</sub>) Prepared by RAFT at 110 °C with BPO in the Presence of LPSCS<sub>2</sub> Macroinitiator.

| run | $M_n^a$<br>(g/mol) | $M_w/M_n$ | Conv. <sup>b</sup><br>(%) | $M_b^c$<br>(g/mol) | $M_{n,th}^c$<br>(g/mol) |
|-----|--------------------|-----------|---------------------------|--------------------|-------------------------|
| 5   | 7500               | 1.2       | 0.0                       | 0                  | 7500                    |
| 6   | 8100               | 1.2       | 0.4                       | 600                | 8100                    |
| 7   | 8500               | 1.2       | 0.6                       | 1000               | 8400                    |
| 8   | 9300               | 1.2       | 1.4                       | 2400               | 9600                    |
| 9   | 9700               | 1.3       | 1.9                       | 1800               | 10400                   |
| 10  | 11300              | 1.2       | 2.9                       | 4000               | 12000                   |
| 11  | 13000              | 1.3       | 4.5                       | 5800               | 14400                   |
| 12  | 17700              | 1.3       | 7.9                       | 10200              | 19700                   |
| 13  | 21300              | 1.3       | 10.6                      | 13800              | 23800                   |
| 14  | 27000              | 1.3       | 15.3                      | 25500              | 31100                   |

<sup>a</sup> Molecular weight of the asymmetric star polystyrene. <sup>b</sup> Conversion of the monomer (St). <sup>c</sup> Molecular weight of the branched chain.

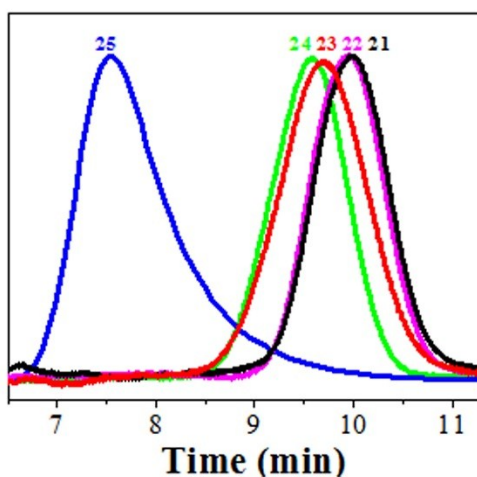

**FIGURE S2.** GPC Traces of the Samples of Miktoarm Star (PS)<sub>2</sub>(PBA). (Here molecular weights of the samples corresponding to the SEC traces of 17 to 21 were listed in Table 2).
